# Supplementary material for: Susceptibility of a heterogeneous catalyst, Rh/γ-alumina, to rapid structural change by exposure to NOElectronic supplementary information (ESI) available: data showing monitoring positions in Fig. 2 and data showing reduction of the NO oxidised Rh adduct on alumina. See http://www.rsc.org/suppdata/cc/b1/b106846f/
Source: Royal Society of Chemistry journal article supplement (doi:10.1039/b106846f), 2002-01-23
Supplement: b106846f.doc [file b106846f.doc]

**Supplementary data showing the monitoring positions in Figure 2**

Two positions were chosen as monitoring points for the structural changes: the white line region close to the absorption edge and a point ~ 265 eV above the absorption edge where is decrease in the EXAFS features is dominated by the reduction in the amplitude of Rh-Rh back scattering.

**Figure S1. Location of points in the XAFS features used to monitor the extent of**

**reaction of the rhodium centres**

**Supplementary data showing reduction of the NO oxidised Rh adduct on alumina**

Supplementary figure S.2 shows the reductive collapse of the oxidised Rh adduct formed under NO. The red markings show the N1Rh derived from analysis EDE spectra collected during the experiment; the pale blue is that due to mass 44 (N2O); the dark blue is due to mass 28 (N2); the yellow shows the response due to mass 30 (NO).

### In this experiment the reduced 5wt% Rh sample has been exposed to NO as described in the main paper to form the new oxidised Rh phase. The microreactor has then been

###

### Figure S.2 Variation in the Rh-Rh co-ordination number and relative mass spectrum intensities for NO, N2 and N2O of a 5wt% Rh sample previously oxidised by 4% NO/He and then exposed to 4% H2/He with a 10K/min temperature ramp.

purged under He before switching the gas flow to a 10 mlmin-1 4%H2/He flow. After establishing that no change in phase has occurred under the reducing flow the sample has then been heated at 10 Kmin-1 to 450K.

It is clear that the oxidised adduct formed under NO is not reduced back to particulate Rh by H2 at room temperature. Instead the EDE shows that the reduction of this phase only occurs at ca. 400K. The collapse of the oxidised phase is associated with the formation of N2O and (latterly) some N2. It should be noted that the mass spectrometric *traces have not been scaled to take into account the relative sensitivity factors of the mass fragments* due to the intrinsic mass transmission function of the mass spectrometer or the cracking pattern of the gas phase species produced. Once these factors are taken into account it is evident that the collapse of the oxidised phase results in the predominant disproportionation of adsorbed NO species to yield N2O with a smaller, slightly higher temperature contribution from N2.

The lower temperature desorption of molecular NO that occurs in the absence of any observable change in the oxidised Rh phase is either due to the molecular desorption of NO adsorbed at Lewis acidic sites upon the Al2O3 support or to adsorption at more weakly Lewis acidic sites within the oxidised Rh adlayer.

Importantly this experiment shows that there is a considerable differential in the kinetic facility of Rh particle oxidation by NO and the reduction of the oxidised phase thus produced back to particulate Rh. As such the dynamic equilibrium between these processes is, in the absence of other factors liable to favour the oxidative process, and as such we may expect NO to have a significant influence of the development, and therefore catalytic properties of, the working steady state catalyst.
